# Supplementary material for: Micronutrients Affect Expression of Induced Resistance Genes in Hydroponically Grown Watermelon against Fusarium oxysporum f. sp. niveum and Meloidogyne incognita
Source: MDPI journal article supplement (doi:10.3390/pathogens11101136), 2022-09-30
Supplement: s1 [file s1]

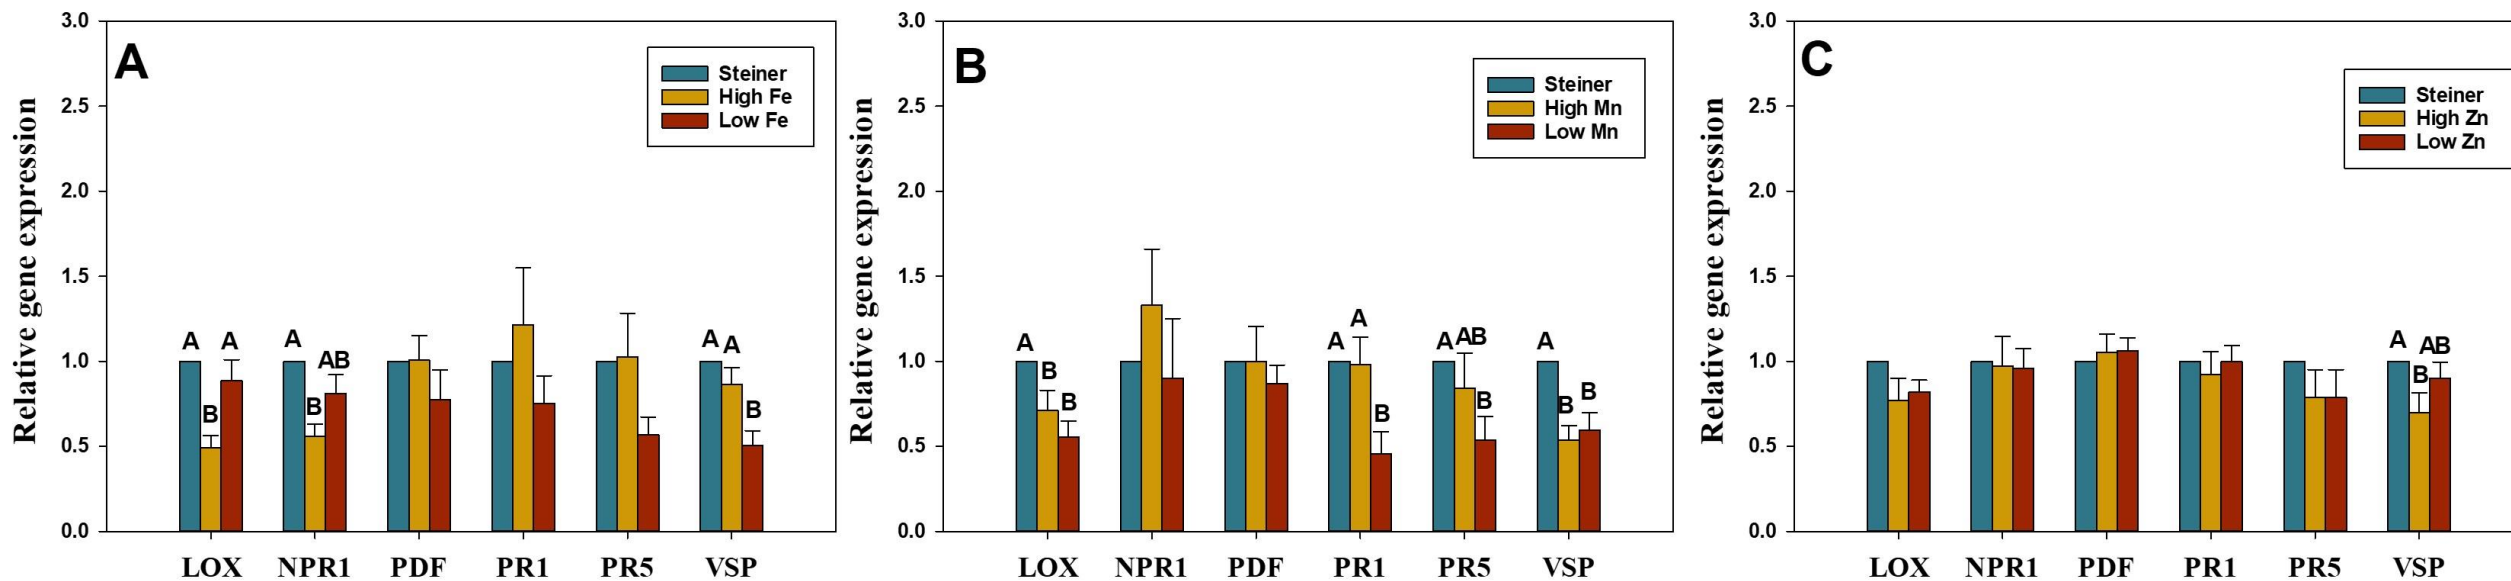

**Figure S1. Relative expression of *NPR1*, *PR1*, *PR5*, *LOX*, *PDF* and *VSP* genes by qRT-PCR in watermelon leaves at 11 day-post-treatment with micronutrients A) Fe, B) Mn, and C) Zn via hydroponics system.** Watermelon seedlings (cv. Sugar Baby; 3 weeks old) were either treated with Fe or Mn or Zn at high (3X), low (0.5X) and standard concentration (X, Steiner) for 11-days. Data are the mean fold changes  $\pm$  SE in gene transcript levels in tissues from micronutrient treated plants relative to tissues from non-treated control plants in Steiner. Letters indicate a significant difference between treatments with the Tukey-Kramer test ( $p < 0.05$ ).
